# Supplementary material for: Resilience and Positive Wellbeing Experienced by 5–12-Year-Old Children with Refugee Backgrounds in Australia: The Childhood Resilience Study
Source: MDPI journal article supplement (doi:10.3390/ijerph21050627), 2024-05-15
Supplement: s1 [file s1]

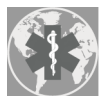

**Table S1.** Mean CRQ-P/C domain and scale scores by gender for children of refugee background, with Tobit logistic regression modelling differences for boys compared to girls (n=102).

| DOMAIN                             | Items (range <sup>1</sup> ) | Girls<br>(n=49)    | Boys<br>(n=53)     | Tobit Regression (comparing boys<br>with girls) |         |
|------------------------------------|-----------------------------|--------------------|--------------------|-------------------------------------------------|---------|
| CRQ Scale                          |                             | Mean [95%CI]       | Mean [95%CI]       | β [95%CI]                                       | p-value |
| <b>PERSONAL strengths</b>          |                             |                    |                    |                                                 |         |
| Positive self                      | 4 (0 - 16)                  | 13.2 [12.4 - 13.9] | 12.9 [12.2 - 13.5] | -0.4 [-1.6 - 0.7]                               | 0.435   |
| Positive future                    | 4 (0 - 16)                  | 13.1 [12.4 - 13.9] | 13.4 [12.6 - 14.1] | 0.4 [-1.1 - 1.9]                                | 0.624   |
| Emotion regulation                 | 3 (0 -12)                   | 8.1 [7.3 - 8.8]    | 8.2 [7.6 - 8.7]    | 0.1 [-0.9 - 1.1]                                | 0.869   |
| <i>Mean personal domain score</i>  | 11 (0 - 16)                 | 11.5 [10.9 - 12.2] | 11.5 [11.0 - 12.0] | 0.1 [-1.1 - 1.2]                                | 0.927   |
| <b>FAMILY strengths</b>            |                             |                    |                    |                                                 |         |
| Connectedness                      | 4 (0 - 16)                  | 13.4 [12.7 - 14.1] | 12.9 [12.1 - 13.7] | -0.6 [-2.0 - 0.9]                               | 0.458   |
| Basic needs                        | 4 (0 - 16)                  | 12.7 [12.0 - 13.5] | 13.5 [12.8 - 14.1] | 0.9 [-0.3 - 2.2]                                | 0.153   |
| Guidance                           | 3 (0 - 12)                  | 8.5 [7.9 - 9.2]    | 8.3 [7.6 - 9.0]    | -0.2 [-1.3 - 0.8]                               | 0.656   |
| <i>Mean family domain score</i>    | 11 (0 - 16)                 | 11.6 [11.0 - 12.2] | 11.6 [11.0 - 12.2] | 0.0 [-1.1 - 1.2]                                | 0.958   |
| <b>SCHOOL strengths</b>            |                             |                    |                    |                                                 |         |
| Teacher support                    | 4 (0 - 16)                  | 13.1 [12.4 - 13.8] | 12.4 [11.6 - 13.1] | -1.1 [-2.6 - 0.4]                               | 0.133   |
| School engagement                  | 4 (0 - 16)                  | 13.7 [13.0 - 14.3] | 13.4 [12.9 - 14.0] | -0.3 [-1.3 - 0.8]                               | 0.625   |
| Friends                            | 3 (0 - 12)                  | 9.2 [8.6 - 9.8]    | 8.9 [8.3 - 9.5]    | -0.3 [-1.3 - 0.6]                               | 0.508   |
| <i>Mean school domain score</i>    | 11 (0 - 16)                 | 12.1 [11.6 - 12.6] | 11.7 [11.2 - 12.2] | -0.9 [-1.9 - 0.1]                               | 0.082   |
| <b>COMMUNITY strengths</b>         |                             |                    |                    |                                                 |         |
| Cultural connectedness             | 4 (0 - 16)                  | 12.7 [11.9 - 13.4] | 12.6 [11.9 - 13.3] | -0.0 [-1.2 - 1.2]                               | 0.990   |
| Connectedness to language          | 4 (0 - 8)                   | 7.0 [6.6 - 7.3]    | 6.6 [6.1 - 7.1]    | -0.3 [-0.9 - 0.3]                               | 0.355   |
| <i>Mean community domain score</i> | 8 (0 - 16)                  | 9.7 [9.3 - 10.2]   | 9.2 [8.6 - 9.9]    | -0.5 [-1.3 - 0.4]                               | 0.297   |
| <b>Total RESILIENCE score</b>      |                             |                    |                    |                                                 |         |
| <i>Mean total scale score</i>      | 43 (0 - 16)                 | 11.4 [10.9 - 11.8] | 11.2 [10.8 - 11.6] | -0.2 [-1.0 - 0.6]                               | 0.614   |

<sup>1</sup> Response options ranged from 0 'Not at all' to 4 'All of the time', with exception of language where response options ranged from 0 'Not at all' to 2 'A lot'.
